# Supplementary material
Source: PubMed Central journal article supplement (PMC4931336)
Supplement: Supp_Figure1.pdf [file Supp_Figure1.pdf]

## Supplementary Data

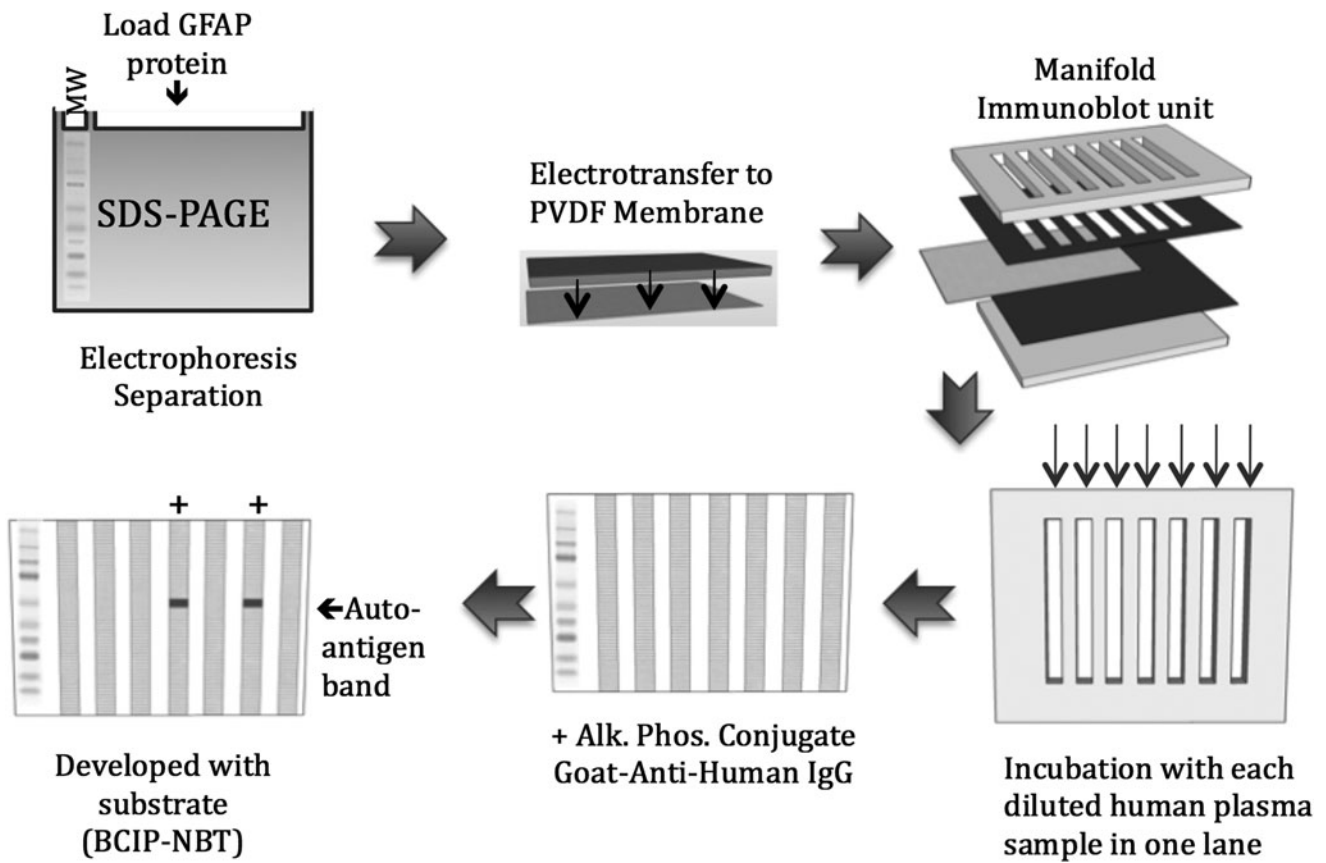

**SUPPLEMENTARY FIG. S1.** Workflow of the manifold-immunoblot method to quantifying human AutoAb[GFAP] levels in plasma samples. AutoAb[GFAP], glial fibrillary acidic protein autoantibody; SDS-PAGE, sodium dodecyl sulfate polyacrylamide gel electrophoresis; PVDF, polyvinylidene fluoride; BCIP-NBT, 5-bromo-4-chloro-3'-indolyphosphate p-toluidine salt and nitro-blue tetrazolium chloride; Alk. Phos., alkaline phosphatase; IgG, immunoglobulin G.
